# Supplementary material
Source: publisher figshare collection journal article supplement (https://tandf.figshare.com/ndownloader/files/30927046)
Supplement: Supplementary file 1 [file 30927046]

# Supplementary materials for “Data transforming augmentation for heteroscedastic models”

## A. Iterative algorithms for univariate linear mixed models in Section 3.1

### A.1. DTA-based iterative algorithms

To sample the full posterior  $p(A, \boldsymbol{\beta} | y^{\text{obs}}) \propto L(A, \boldsymbol{\beta}; y^{\text{obs}}) I_{A>0}$ , Kelly (2014) proposes the following DTA-based Gibbs-type algorithm that iteratively samples  $[y^{\text{aug}} | y^{\text{obs}}, A, \boldsymbol{\beta}]$  and  $[A, \boldsymbol{\beta} | y^{\text{aug}}]$ . These two conditional distributions can be directly sampled from standard family distributions:

$$\begin{aligned} [y_i^{\text{aug}} | y_i^{\text{obs}}, A, \boldsymbol{\beta}] &\sim N_1 \left( (1 - w_i B_i) y_i^{\text{obs}} + w_i B_i x_i^\top \boldsymbol{\beta}, w_i V_{\min} + w_i^2 V_i (1 - B_i) \right), \\ [A | y^{\text{aug}}] &\sim \text{IG} \left( (k - m - 2)/2, (y^{\text{aug}} - X \hat{\boldsymbol{\beta}})^\top (y^{\text{aug}} - X \hat{\boldsymbol{\beta}})/2 \right) \text{ for } A > V_{\min}, \\ [\boldsymbol{\beta} | A, y^{\text{aug}}] &\sim N_m \left( \hat{\boldsymbol{\beta}}, (A + V_{\min})(X^\top X)^{-1} \right), \end{aligned} \quad (20)$$

where  $w_i = 1 - V_{\min}/V_i$ ,  $B_i = V_i/(V_i + A)$ ,  $y^{\text{aug}} = (y_1^{\text{aug}}, \dots, y_k^{\text{aug}})^\top$ ,  $\text{IG}(a, b)$  denotes the inverse-Gamma distribution with shape parameter  $a$  and scale parameter  $b$ ,  $X$  is a  $k$  by  $m$  matrix whose row vector is  $\mathbf{x}_i^\top$ , and  $\hat{\boldsymbol{\beta}} = (X^\top X)^{-1} X^\top y^{\text{aug}}$ . The second step in (20) can be achieved by repeatedly sampling  $A$  from the inverse-Gamma distribution until  $A > V_{\min}$  or by an inverse CDF sampling method if its cumulative distribution function and quantile function are available; also see Appendix of Everson and Morris (2000).

Kelly (2014) also derives the corresponding DTA-based EM algorithm for the posterior modes (or maximum likelihood estimates) of  $A$  and  $\boldsymbol{\beta}$  by constructing the following

$Q$  function in the E-step: Since  $[y_i^{\text{aug}} | A, \boldsymbol{\beta}] \sim N_1(\mathbf{x}_i^\top \boldsymbol{\beta}, A + V_{\min})$  under DTA,

$$\begin{aligned} Q(A, \boldsymbol{\beta} | A^*, \boldsymbol{\beta}^*) &= \sum_{i=1}^k E(\log(f(y_i^{\text{aug}} | A, \boldsymbol{\beta})) | y^{\text{obs}}, A^*, \boldsymbol{\beta}^*), \\ &= -\frac{k}{2} \log(A + V_{\min}) - \frac{\sum_{i=1}^k E((y_i^{\text{aug}} - \mathbf{x}_i^\top \boldsymbol{\beta})^2 | y^{\text{obs}}, A^*, \boldsymbol{\beta}^*)}{2(A + V_{\min})}, \end{aligned}$$

where  $A^*$  and  $\boldsymbol{\beta}^*$  are the values that have maximized the  $Q$  function in the previous iteration. The conditional expectation in the second equality can be computed by

$$E((y_i^{\text{aug}} - \mathbf{x}_i^\top \boldsymbol{\beta})^2 | y^{\text{obs}}, A^*, \boldsymbol{\beta}^*) = (E(y_i^{\text{aug}} | y^{\text{obs}}, A^*, \boldsymbol{\beta}^*) - \mathbf{x}_i^\top \boldsymbol{\beta})^2 + \text{Var}(y_i^{\text{aug}} | y^{\text{obs}}, A^*, \boldsymbol{\beta}^*),$$

where the conditional mean and variance on the right-hand side, i.e.,  $E(y_i^{\text{aug}} | y^{\text{obs}}, A^*, \boldsymbol{\beta}^*)$  and  $\text{Var}(y_i^{\text{aug}} | y^{\text{obs}}, A^*, \boldsymbol{\beta}^*)$ , are specified in (20). Maximizing this  $Q$  function with respect to  $\boldsymbol{\beta}$  and  $A$  results in the following M-step with closed-form updates for  $\boldsymbol{\beta}$  and  $A$ :

$$\text{Step 1: } \boldsymbol{\beta}' \leftarrow (X^\top X)^{-1} X^\top E(y^{\text{aug}} | y^{\text{obs}}, A^*, \boldsymbol{\beta}^*),$$

$$\text{Step 2: } A' \leftarrow \max \left\{ \frac{1}{k} \sum_{i=1}^k E((y_i^{\text{aug}} - \mathbf{x}_i^\top \boldsymbol{\beta}')^2 | y^{\text{obs}}, A^*, \boldsymbol{\beta}^*) - V_{\min}, 0 \right\},$$

$$\text{Step 3: } (\boldsymbol{\beta}^*, A^*) \leftarrow (\boldsymbol{\beta}', A').$$

## A.2. DA-based iterative algorithms

We treat the random effects  $\theta = (\theta_1, \dots, \theta_k)^\top$  as missing data, which is typical in fitting hierarchical or mixed-effects models via DA-based iterative algorithms (van Dyk, 2000). The resulting DA-based Gibbs algorithm iteratively samples

$$\begin{aligned} [\theta_i | y_i^{\text{obs}}, A, \boldsymbol{\beta}] &\sim N_1((1 - B_i)y_i^{\text{obs}} + B_i \mathbf{x}_i^\top \boldsymbol{\beta}, V_i(1 - B_i)), \\ [A | \theta, y^{\text{obs}}] &\sim \text{IG}\left((k - m - 2)/2, (\theta - X \hat{\boldsymbol{\beta}}_{\text{DA}})^\top (\theta - X \hat{\boldsymbol{\beta}}_{\text{DA}})/2\right), \\ [\boldsymbol{\beta} | A, \theta, y^{\text{obs}}] &\sim N_m(\hat{\boldsymbol{\beta}}_{\text{DA}}, A(X^\top X)^{-1}), \end{aligned} \tag{21}$$

where  $\hat{\boldsymbol{\beta}}_{\text{DA}} = (X^\top X)^{-1} X^\top \theta$ . Kelly (2014) also shows a DA-based EM algorithm that corresponds to the Gibbs sampler in (21). Its E-step computes the  $Q$  function as follows:

$$\begin{aligned} Q(A, \boldsymbol{\beta} \mid A^*, \boldsymbol{\beta}^*) &= \sum_{i=1}^k E(\log(f(\theta_i \mid A, \boldsymbol{\beta})) \mid y^{\text{obs}}, A^*, \boldsymbol{\beta}^*) \\ &= -\frac{k}{2} \log(A) - \frac{\sum_{i=1}^k E((\theta_i - \mathbf{x}_i^\top \boldsymbol{\beta})^2 \mid y^{\text{obs}}, A^*, \boldsymbol{\beta}^*)}{2A}, \end{aligned}$$

where

$$E((\theta_i - \mathbf{x}_i^\top \boldsymbol{\beta})^2 \mid y^{\text{obs}}, A^*, \boldsymbol{\beta}^*) = (E(\theta_i \mid y^{\text{obs}}, A^*, \boldsymbol{\beta}^*) - \mathbf{x}_i^\top \boldsymbol{\beta})^2 + \text{Var}(\theta_i \mid y^{\text{obs}}, A^*, \boldsymbol{\beta}^*). \quad (22)$$

The conditional mean and variance on the right-hand side of (22) are specified in (21). The resulting M-step sets  $\boldsymbol{\beta}^*$  and  $A^*$  to the values that maximize this  $Q$  function and these values are also closed-form updates as follows:

$$\text{Step 1: } \boldsymbol{\beta}' \leftarrow (X^\top X)^{-1} X^\top E(\theta \mid y^{\text{obs}}, A^*, \boldsymbol{\beta}^*),$$

$$\text{Step 2: } A' \leftarrow \frac{1}{k} \sum_{i=1}^k E((\theta_i - \mathbf{x}_i^\top \boldsymbol{\beta})^2 \mid y^{\text{obs}}, A^*, \boldsymbol{\beta}^*),$$

$$\text{Step 3: } (\boldsymbol{\beta}^*, A^*) \leftarrow (\boldsymbol{\beta}', A').$$

## B. Iterative algorithms for multivariate linear mixed models in Section 3.2

### B.1. DTA-based iterative algorithms

The joint posterior distribution  $p(\mathbf{A}, \boldsymbol{\beta} \mid \mathbf{y}^{\text{aug}})$  factors into the following two conditional distributions,  $p(\mathbf{A}, \boldsymbol{\beta} \mid \mathbf{y}^{\text{aug}}) = p_1(\mathbf{A} \mid \mathbf{y}^{\text{aug}}) p_2(\boldsymbol{\beta} \mid \mathbf{A}, \mathbf{y}^{\text{aug}})$ , and these can be directly sampled via inverse-Wishart and multivariate Gaussian distributions in a homoscedastic case. A DTA-based Gibbs-type algorithm specified in (3) iteratively samples the following three

conditional distributions.

$$\begin{aligned}
[\mathbf{y}_i^{\text{aug}} \mid \mathbf{y}_i^{\text{obs}}, \mathbf{A}, \boldsymbol{\beta}] &\sim N_p((1 - W_i B_i) \mathbf{y}_i^{\text{obs}} + W_i B_i X_i \boldsymbol{\beta}, \mathbf{V}_{\min} W_i^\top + W_i (1 - B_i) \mathbf{V}_i W_i^\top), \\
[\mathbf{A} + \mathbf{V}_{\min} \mid \mathbf{y}^{\text{aug}}] &\sim \text{IW}\left(k - m - p - 1, \sum_{i=1}^k (\mathbf{y}_i^{\text{aug}} - X_i \hat{\boldsymbol{\beta}}_{\text{DTA}})(\mathbf{y}_i^{\text{aug}} - X_i \hat{\boldsymbol{\beta}}_{\text{DTA}})^\top\right), \\
[\boldsymbol{\beta} \mid \mathbf{A}, \mathbf{y}^{\text{aug}}] &\sim N_{mp}\left(\hat{\boldsymbol{\beta}}_{\text{DTA}}, \left(\sum_{i=1}^k X_i^\top (\mathbf{A} + \mathbf{V}_{\min})^{-1} X_i\right)^{-1}\right),
\end{aligned} \tag{23}$$

where  $B_i = \mathbf{V}_i(\mathbf{V}_i + \mathbf{A})^{-1}$ ,  $\text{IW}(a, b)$  indicates the inverse-Wishart distribution with  $a$  degrees of freedom and scale matrix  $b$ , and

$$\hat{\boldsymbol{\beta}}_{\text{DTA}} = \left(\sum_{i=1}^k X_i^\top (\mathbf{A} + \mathbf{V}_{\min})^{-1} X_i\right)^{-1} \sum_{i=1}^k X_i^\top (\mathbf{A} + \mathbf{V}_{\min})^{-1} \mathbf{y}_i^{\text{aug}}.$$

To sample  $\mathbf{A}$  instead of  $\mathbf{A} + \mathbf{V}_{\min}$  in the middle of (23), we repeatedly draw a random sample  $K$  from the inverse-Wishart distribution in (23) until  $|K - \mathbf{V}_{\min}| > 0$ , and then set  $\mathbf{A}$  to  $K - \mathbf{V}_{\min}$ .

We specify the corresponding DTA-based EM algorithm by constructing the  $Q$  function for the E-step, using the marginal distribution  $[\mathbf{y}_i^{\text{aug}} \mid \mathbf{A}, \boldsymbol{\beta}] \sim N_p(\mathbf{X}_i \boldsymbol{\beta}, \mathbf{A} + \mathbf{V}_{\min})$ :

$$\begin{aligned}
Q(\mathbf{A}, \boldsymbol{\beta} \mid \mathbf{A}^*, \boldsymbol{\beta}^*) &= \sum_{i=1}^k E(\log(f(\mathbf{y}_i^{\text{aug}} \mid \mathbf{A}, \boldsymbol{\beta})) \mid \mathbf{y}_i^{\text{obs}}, \mathbf{A}^*, \boldsymbol{\beta}^*) \\
&= -\frac{k}{2} \log(|\mathbf{A} + \mathbf{V}_{\min}|) - \frac{1}{2} \sum_{i=1}^k E((\mathbf{y}_i^{\text{aug}} - X_i \boldsymbol{\beta})^\top (\mathbf{A} + \mathbf{V}_{\min})^{-1} (\mathbf{y}_i^{\text{aug}} - X_i \boldsymbol{\beta}) \mid \mathbf{y}_i^{\text{obs}}, \mathbf{A}^*, \boldsymbol{\beta}^*).
\end{aligned} \tag{24}$$

The conditional expectation of a quadratic form in the second equality is equivalent to

$$\begin{aligned}
&E((\mathbf{y}_i^{\text{aug}} - X_i \boldsymbol{\beta})^\top (\mathbf{A} + \mathbf{V}_{\min})^{-1} (\mathbf{y}_i^{\text{aug}} - X_i \boldsymbol{\beta}) \mid \mathbf{y}_i^{\text{obs}}, \mathbf{A}^*, \boldsymbol{\beta}^*) \\
&= (E(\mathbf{y}_i^{\text{aug}} \mid \mathbf{y}_i^{\text{obs}}, \mathbf{A}^*, \boldsymbol{\beta}^*) - X_i \boldsymbol{\beta})^\top (\mathbf{A} + \mathbf{V}_{\min})^{-1} (E(\mathbf{y}_i^{\text{aug}} \mid \mathbf{y}_i^{\text{obs}}, \mathbf{A}^*, \boldsymbol{\beta}^*) - X_i \boldsymbol{\beta}) \\
&\quad + \text{trace}[(\mathbf{A} + \mathbf{V}_{\min})^{-1} \text{Cov}(\mathbf{y}_i^{\text{aug}} \mid \mathbf{y}_i^{\text{obs}}, \mathbf{A}^*, \boldsymbol{\beta}^*)].
\end{aligned} \tag{25}$$

The conditional expectation and covariance of  $\mathbf{y}_i^{\text{aug}}$  on the right-hand side in (25), i.e.,  $E(\mathbf{y}_i^{\text{aug}} \mid \mathbf{y}_i^{\text{obs}}, \mathbf{A}^*, \boldsymbol{\beta}^*)$  and  $\text{Cov}(\mathbf{y}_i^{\text{aug}} \mid \mathbf{y}_i^{\text{obs}}, \mathbf{A}^*, \boldsymbol{\beta}^*)$ , are specified in (23).

The M-step updates  $\mathbf{A}^*$  and  $\boldsymbol{\beta}^*$  by the values that maximize the  $Q$  function in (24),

which results in the following four steps for closed-form updates:

$$\begin{aligned}
\text{Step 1: } \boldsymbol{\beta}' &\leftarrow \left( \sum_{i=1}^k X_i^\top X_i \right)^{-1} \sum_{i=1}^k X_i^\top E(\mathbf{y}_i^{\text{aug}} \mid \mathbf{y}^{\text{obs}}, \mathbf{A}^*, \boldsymbol{\beta}^*). \\
\text{Step 2: } \mathbf{A}_{\text{temp}} &\leftarrow \frac{1}{k} \sum_{i=1}^k \left\{ \left( E(\mathbf{y}_i^{\text{aug}} \mid \mathbf{y}^{\text{obs}}, \mathbf{A}^*, \boldsymbol{\beta}^*) - X_i \boldsymbol{\beta}' \right) \left( E(\mathbf{y}_i^{\text{aug}} \mid \mathbf{y}^{\text{obs}}, \mathbf{A}^*, \boldsymbol{\beta}^*) - X_i \boldsymbol{\beta}' \right)^\top \right. \\
&\quad \left. + \text{Cov}(\mathbf{y}_i^{\text{aug}} \mid \mathbf{y}^{\text{obs}}, \mathbf{A}^*, \boldsymbol{\beta}^*) \right\} - \mathbf{V}_{\min}. \\
\text{Step 3: } \mathbf{A}' &\leftarrow \mathbf{A}_{\text{temp}} \text{ if } |\mathbf{A}_{\text{temp}}| > 0 \text{ and } \mathbf{A}^* \leftarrow 0_p \text{ otherwise.} \\
\text{Step 4: } (\boldsymbol{\beta}^*, \mathbf{A}^*) &\leftarrow (\boldsymbol{\beta}', \mathbf{A}').
\end{aligned}$$

The notation  $0_p$  in Step 3 indicates a  $p$  by  $p$  matrix filled with zeros.

## B.2. DA-based iterative algorithms

In a typical DA scheme, we treat the random effects,  $\boldsymbol{\theta} \equiv \{\boldsymbol{\theta}_1, \dots, \boldsymbol{\theta}_k\}$ , as missing data, and thus the augmented data in this case are  $\mathbf{y}^{\text{aug}} = (\mathbf{y}^{\text{obs}}, \boldsymbol{\theta})$ . The full posterior density function of  $[\boldsymbol{\theta}, \boldsymbol{\beta}, \mathbf{A} \mid \mathbf{y}^{\text{obs}}]$  can be derived up to a constant multiplication, i.e.,

$$\pi(\boldsymbol{\theta}, \boldsymbol{\beta}, \mathbf{A} \mid \mathbf{y}^{\text{obs}}) \propto \prod_{i=1}^k f(\mathbf{y}_i^{\text{obs}} \mid \boldsymbol{\theta}_i) p(\boldsymbol{\theta}_i \mid \boldsymbol{\beta}, \mathbf{A}) I_{|\mathbf{A}|>0},$$

where  $[\mathbf{y}_i^{\text{obs}} \mid \boldsymbol{\theta}_i]$  and  $[\boldsymbol{\theta}_i \mid \mathbf{A}, \boldsymbol{\beta}]$  are defined in (11). Similarly to the DTA-based Gibbs sampler in (23), the DA-based one iteratively samples the following conditional distributions:

$$\begin{aligned}
[\boldsymbol{\theta}_i \mid \mathbf{y}_i^{\text{obs}}, \mathbf{A}, \boldsymbol{\beta}] &\sim N_p \left( (1 - B_i) \mathbf{y}_i^{\text{obs}} + B_i X_i \boldsymbol{\beta}, (1 - B_i) \mathbf{V}_i \right), \\
[\mathbf{A} \mid \boldsymbol{\theta}, \mathbf{y}^{\text{obs}}] &\sim \text{IW} \left( k - m - p - 1, \sum_{i=1}^k (\boldsymbol{\theta}_i - X_i \hat{\boldsymbol{\beta}}_{\text{DA}}) (\boldsymbol{\theta}_i - X_i \hat{\boldsymbol{\beta}}_{\text{DA}})^\top \right), \\
[\boldsymbol{\beta} \mid \mathbf{A}, \boldsymbol{\theta}, \mathbf{y}^{\text{obs}}] &\sim N_{mp} \left( \hat{\boldsymbol{\beta}}_{\text{DA}}, \left( \sum_{i=1}^k X_i^\top \mathbf{A}^{-1} X_i \right)^{-1} \right),
\end{aligned} \tag{26}$$

where  $B_i = \mathbf{V}_i (\mathbf{V}_i + \mathbf{A})^{-1}$  and

$$\hat{\boldsymbol{\beta}}_{\text{DA}} = \left( \sum_{i=1}^k X_i^\top \mathbf{A}^{-1} X_i \right)^{-1} \sum_{i=1}^k X_i^\top \mathbf{A}^{-1} \boldsymbol{\theta}_i.$$

The corresponding DA-based EM algorithm adopts the following  $Q$  function for the E-step, using the distribution of missing data,  $[\boldsymbol{\theta}_i | \mathbf{A}, \boldsymbol{\beta}] \sim \text{N}_p(\mathbf{X}_i \boldsymbol{\beta}, \mathbf{A})$ :

$$\begin{aligned} Q(\mathbf{A}, \boldsymbol{\beta} | \mathbf{A}^*, \boldsymbol{\beta}^*) &= \sum_{i=1}^k E(\log(f(\boldsymbol{\theta}_i | \mathbf{A}, \boldsymbol{\beta})) | \mathbf{y}^{\text{obs}}, \mathbf{A}^*, \boldsymbol{\beta}^*), \\ &= -\frac{k}{2} \log(|\mathbf{A}|) - \frac{1}{2} \sum_{i=1}^k E((\boldsymbol{\theta}_i - X_i \boldsymbol{\beta})^\top \mathbf{A}^{-1} (\boldsymbol{\theta}_i - X_i \boldsymbol{\beta}) | \mathbf{y}^{\text{obs}}, \mathbf{A}^*, \boldsymbol{\beta}^*). \end{aligned} \quad (27)$$

The conditional expectation of a quadratic form on the right-hand side in (27) can be computed by

$$\begin{aligned} &E((\boldsymbol{\theta}_i - X_i \boldsymbol{\beta})^\top \mathbf{A}^{-1} (\boldsymbol{\theta}_i - X_i \boldsymbol{\beta}) | \mathbf{y}^{\text{obs}}, \mathbf{A}^*, \boldsymbol{\beta}^*) \\ &= (E(\boldsymbol{\theta}_i | \mathbf{y}^{\text{obs}}, \mathbf{A}^*, \boldsymbol{\beta}^*) - X_i \boldsymbol{\beta})^\top \mathbf{A}^{-1} (E(\boldsymbol{\theta}_i | \mathbf{y}^{\text{obs}}, \mathbf{A}^*, \boldsymbol{\beta}^*) - X_i \boldsymbol{\beta}) \\ &\quad + \text{trace}[\mathbf{A}^{-1} \text{Cov}(\boldsymbol{\theta}_i | \mathbf{y}^{\text{obs}}, \mathbf{A}^*, \boldsymbol{\beta}^*)]. \end{aligned} \quad (28)$$

The conditional expectation and covariance of  $\boldsymbol{\theta}_i$  given  $\mathbf{y}^{\text{obs}}, \mathbf{A}, \boldsymbol{\beta}$  in (28) are specified in (26).

Like the M-step under DTA in (24), the M-step under DA updates  $\mathbf{A}^*$  and  $\boldsymbol{\beta}^*$  by the values that maximize the  $Q$  function in (27) via the following three steps:

$$\begin{aligned} \text{Step 1: } \boldsymbol{\beta}' &\leftarrow \left( \sum_{i=1}^k X_i^\top X_i \right)^{-1} \sum_{i=1}^k X_i^\top E(\boldsymbol{\theta}_i | \mathbf{y}^{\text{obs}}, \mathbf{A}^*, \boldsymbol{\beta}^*). \\ \text{Step 2: } \mathbf{A}' &\leftarrow \frac{1}{k} \sum_{i=1}^k \left\{ (E(\boldsymbol{\theta}_i | \mathbf{y}^{\text{obs}}, \mathbf{A}^*, \boldsymbol{\beta}^*) - X_i \boldsymbol{\beta}') (E(\boldsymbol{\theta}_i | \mathbf{y}^{\text{obs}}, \mathbf{A}^*, \boldsymbol{\beta}^*) - X_i \boldsymbol{\beta}')^\top \right. \\ &\quad \left. + \text{Cov}(\boldsymbol{\theta}_i | \mathbf{y}^{\text{obs}}, \mathbf{A}^*, \boldsymbol{\beta}^*) \right\}. \\ \text{Step 3: } (\boldsymbol{\beta}^*, \mathbf{A}^*) &\leftarrow (\boldsymbol{\beta}', \mathbf{A}'). \end{aligned}$$

## C. The DTA scheme for the Beta-Binomial model in Section 4

Given the homoscedastic augmented data  $y^{\text{aug}}$ , we reproduce the approximate marginal posterior density  $p^*(\beta | y^{\text{aug}})$  from (17): With  $g(l) = nk + c + l$ ,

$$p^*(\beta | y^{\text{aug}}) = \sum_{i=s_1}^{s_t} \sum_{j=f_1}^{f_t} \sum_{l=0}^{km_1+m_2} a_i b_j c_l^* B(g(l) - i - 1, i + 1) \frac{\beta^j}{(\beta + n_{\max})^{g(l)-i-1}},$$

where  $s_1$  denotes the number of groups with at least one success,  $s_t$  is the total number of successes ( $s_t = \sum_{i=1}^k y_i^{\text{aug}}$ ),  $f_1$  indicates the number of groups with at least one failure, and  $f_t$  is the total number of failures ( $f_t = \sum_{i=1}^k (n - y_i^{\text{aug}})$ ). If we transform  $\beta$  into  $B = \beta/(\beta + n_{\max})$ , the corresponding density function with respect to  $B$  is as follows: With the Jacobean  $J = n_{\max}/(1 - B)^2$ ,

$$p^*(B \mid y^{\text{aug}}) = \sum_{i=s_1}^{s_t} \sum_{j=f_1}^{f_t} \sum_{l=0}^{km_1+m_2} a_i b_j c_l^* B(g(l) - i - 1, i + 1) \frac{B^j (1 - B)^{g(l) - i - j - 3}}{n_{\max}^{g(l) - i - j - 1}}.$$

Thus, each mixture component is composed of the  $\text{Beta}(j + 1, g(l) - i - j - 2)$  density function and the corresponding coefficient (that is proportional to its weight) equal to

$$a_i b_j c_l^* B(g(l) - i - 1, i + 1) B(j + 1, g(l) - i - j - 2) n_{\max}^{-(g(l) - i - j - 1)}. \quad (29)$$

We can easily generate  $B = \beta/(\beta + n_{\max})$  via a two-step procedure; (i) we randomly choose a combination of  $(i, j, l)$  according to its weight defined in (29), and (ii) given the selected values of  $(i, j, l)$ , we can generate  $B$  from the  $\text{Beta}(j + 1, g(l) - i - j - 2)$  distribution. Finally, we set  $\beta = n_{\max} B/(1 - B)$  that is a random number generated from  $p^*(\beta \mid y^{\text{aug}})$ .

Given the random number from  $p^*(\beta \mid y^{\text{aug}})$ , we need to sample  $p^*(\alpha \mid y^{\text{aug}}, \beta)$  that is proportional to  $p^*(\alpha, \beta \mid y^{\text{aug}})$  in (16), i.e.,

$$p^*(\alpha \mid y^{\text{aug}}, \beta) \propto \sum_{i=s_1}^{s_t} \sum_{j=f_1}^{f_t} \sum_{l=0}^{km_1+m_2} a_i b_j c_l^* \frac{\alpha^i \beta^j}{(\alpha + \beta + n_{\max})^{g(l)}}.$$

Once we transform  $\alpha$  to  $A = \alpha/(\alpha + \beta + n_{\max})$ , we obtain the following density function with the Jacobean  $J = (\beta + n_{\max})/(1 - A)^2$ :

$$\begin{aligned} p^*(A \mid y^{\text{aug}}, \beta) &\propto \sum_{i=s_1}^{s_t} \sum_{j=f_1}^{f_t} \sum_{l=0}^{km_1+m_2} a_i b_j c_l^* \frac{\beta^j}{(\beta + n_{\max})^{g(l) - i - 1}} A^i (1 - A)^{g(l) - i - 2} \\ &= \left( \sum_{j=f_1}^{f_t} b_j \beta^j \right) \left( \sum_{i=s_1}^{s_t} \sum_{l=0}^{km_1+m_2} a_i c_l^* \frac{1}{(\beta + n_{\max})^{g(l) - i - 1}} A^i (1 - A)^{g(l) - i - 2} \right) \quad (30) \\ &\propto \sum_{i=s_1}^{s_t} \sum_{l=0}^{km_1+m_2} a_i c_l^* \frac{1}{(\beta + n_{\max})^{l - i - 1}} A^i (1 - A)^{g(l) - i - 2}. \end{aligned}$$

Then, the density with respect to  $A$  is a mixture of the  $\text{Beta}(i + 1, g(l) - i - 1)$  densities

with its coefficient (weight) equal to

$$a_i c_i^* \frac{B(i+1, g(l) - i - 1)}{(\beta + n_{\max})^{l-i-1}}. \quad (31)$$

Sampling  $\alpha$  from  $p^*(\alpha \mid y^{\text{aug}}, \beta)$  is a three-step procedure; (i) a combination of  $(i, l)$  is randomly selected according to its weight in (31), (ii) a value of  $A$  is randomly generated from the  $\text{Beta}(i+1, g(l) - i - 1)$  distribution given the chosen values of  $(i, l)$ , and finally (iii)  $\alpha$  is set to  $(n_{\max} + \beta)A/(1 - A)$ .

Therefore, the proposed augmentation scheme for heteroscedastic Binomial data results in a Gibbs-type algorithm that iterates for following five steps:

Step 1: Sample  $\theta_i \sim \text{Beta}(y_i^{\text{obs}} + \alpha, n_i - y_i^{\text{obs}} + \beta)$  for  $i = 1, \dots, k$ .

Step 2: Sample  $y_i^{\text{mis}} \sim \text{Bin}(n_{\max} - n_i, \theta_i)$  for  $i = 1, \dots, k$ .

Step 3: Set  $y_i^{\text{aug}} = y_i^{\text{obs}} + y_i^{\text{mis}}$  for  $i = 1, \dots, k$ .

Step 4: Sample  $\beta$  from  $p^*(\beta \mid y^{\text{aug}})$ .

Step 5: Sample  $\alpha$  from  $p^*(\alpha \mid y^{\text{aug}}, \beta)$ .

We note that Steps 1–3 are corresponding to the first two steps of (2), and Steps 4–5 are related to the last step of (2).

## References

- Everson, P. J. and Morris, C. N. (2000). Simulation from Wishart Distributions with Eigenvalue Constraints. *Journal of Computational and Graphical Statistics*, 9(2):380–389.
- Kelly, J. (2014). *Advances in the Normal-Normal Hierarchical Model*. PhD thesis, Harvard University.
- van Dyk, D. A. (2000). Fitting Mixed-Effects Models Using Efficient EM-Type Algorithms. *Journal of Computational and Graphical Statistics*, 9(1):78–98.
